# Supplementary material
Source: publisher figshare collection journal article supplement (https://acs.figshare.com/ndownloader/files/5838840)
Supplement: Supplementary file 1 [file 5838840]

Supplemental Materials for:

**The Palladium-Catalyzed Enantioselective Oxidation of Alcohols: A Dramatic Rate Acceleration by  $\text{Cs}_2\text{CO}_3/t\text{-BuOH}$**

Jeffrey T. Bagdanoff, Eric M. Ferreira and Brian M. Stoltz\*

*The Arnold and Mabel Laboratories of Chemical Synthesis, Division of Chemistry and Chemical Engineering, California Institute of Technology, Pasadena, California, 91125, USA*

**Material and Methods.** Unless stated otherwise, reactions were performed in oven-dried glassware, under an atmosphere of oxygen, using freshly distilled solvents. Although we have never experienced an accident, all reactions must be performed with appropriate caution in a fume hood due to the flammable nature of mixtures of oxygen and organic solvents. All other commercially obtained reagents were used as received. Reaction temperatures were controlled by an IKAmag temperature modulator. Thin-layer chromatography (TLC) was performed using E. Merck silica gel 60 F254 precoated plates (0.25 mm). ICN Silica gel (particle size 0.032-0.063 mm) was used for flash chromatography. Analytical chiral HPLC was performed on a Chiralcel OJ, AS, AD, OB-H or OD-H column (each is 4.6 mm x 25 cm) obtained from Daicel Chemical Industries, Ltd. Analytical achiral GC was performed using an Agilent DB-WAX (30.0 m x 0.25 mm) column. Analytical chiral GC was carried out using a Chiraldex B-DM column (30.0 m x 0.25 mm) purchased from Bodman Industries. Commercially available racemic alcohols in Table 3 (entries 1, 2, 3, 6, 7, 8, and 9) were purchased from the Sigma-Aldrich Chemical Company, Milwaukee, WI. Non-commercially available racemic alcohols used in Table 3 (corresponding to entries 4, 6, and 10) were prepared as previously described.<sup>1</sup> Commercially available samples of enantiopure alcohols for analytical comparison purposes (entries 1, 7, 8, and 9) were purchased from the Sigma-Aldrich Chemical Company, Milwaukee, WI. Non-commercially available enantiopure alcohols prepared by palladium-catalyzed oxidative kinetic resolution (Table 3 entries 2,<sup>2</sup> 3,<sup>3</sup> 6,<sup>4</sup> and 10<sup>1,5</sup>) were compared by optical rotation to known values. The previously unknown enantiopure alcohols (Table 3, entries 4 and 5) were assigned absolute stereochemistry by analogy to assigned resolution products.

---

<sup>1</sup> (a) Ruble, J. C.; Latham, H. A.; Fu, G. C. *J. Am. Chem. Soc.* **1997**, *119*, 1492. (b) Ruble, J. C., Tweddell, J.; Fu, G. C. *J. Org. Chem.* **1998**, *63*, 2794.

<sup>2</sup> Nakamura, K.; Inoue, Y.; Matsuda, T.; Misawa, I. *J. Chem. Soc., Perkin. Trans. 1* **1999**, 2397.

<sup>3</sup> Nieduzak, T. R.; Margolin, A. L. *Tetrahedron: Asymmetry* **1991**, *2*, 113.

<sup>4</sup> Nakamura, K.; Matsuda, T. *J. Org. Chem.* **1998**, *63*, 8957.

<sup>5</sup> Argus, C. L.; Cort, L. A.; Howard, T. J.; Loc, L. B. *J. Chem. Soc.* **1960**, 1195.

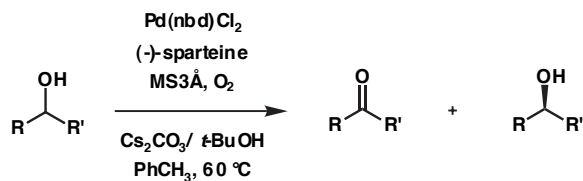

### General Procedure for the Rate Accelerated Oxidative Kinetic Resolution of Secondary Alcohols.

An oven dried reaction tube (outer diameter 16 mm, length 120 mm) equipped with a magnetic stir bar was charged with oven dried powdered molecular sieves (MS3Å, 0.5 g). After cooling, Pd(nbd)Cl<sub>2</sub> complex (0.05 mmol, 0.05 equiv) was added followed by toluene (2.0 mL), and (–)-sparteine (0.2 mmol, 0.20 equiv). The flask was cooled to -78 °C, then vacuum evacuated and filled with O<sub>2</sub> (3x, balloon), then heated to 60 °C for 15 min. Powdered anhydrous Cs<sub>2</sub>CO<sub>3</sub> (0.5 mmol, 0.5 equiv),<sup>6</sup> a toluene solution (2.0 mL) of the alcohol (1.0 mmol, 1.0 equiv), and *t*-BuOH (1.5 mmol, 1.5 equiv.) was introduced and the reaction mixture was maintained at 60 °C. The reaction was monitored by standard analytical techniques (TLC, GC, <sup>1</sup>H-NMR, and HPLC) for % conversion and enantiomeric excess values. Aliquots of the reaction mixture (0.2 mL) were collected after 2 h, 4 h, 8 h, 12 h, 15 h, and 18 h depending on the course of the reaction (typically three aliquots per run). Each aliquot was filtered through a small plug of silica gel (Et<sub>2</sub>O eluent), evaporated and analyzed.<sup>7</sup>

Optical rotations for new compounds:

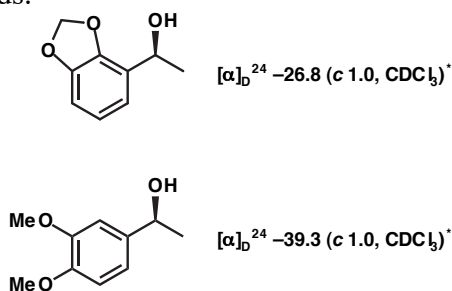

\*absolute stereochemistry of these molecules assigned by analogy.

<sup>6</sup> For experiments that probed the effect of other additives, the appropriate base/alcohol was used in the same general procedure.

<sup>7</sup> Percent conversions were measured by GC integration of the alcohol and the ketone peaks, correcting for response factors (for conditions see SM Table 2).

Table SM 1. Methods utilized for the determination of enantiomeric excess.

| entry | Substrate                                                                           | ee Assay               | Conditions                         | Retention Time of (R) isomer (min) | Retention Time of (S) isomer (min) |
|-------|-------------------------------------------------------------------------------------|------------------------|------------------------------------|------------------------------------|------------------------------------|
| 1.    | 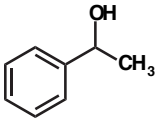   | HPLC<br>Chiralcel OD-H | 2% EtOH/hexane<br>1.0 mL/min       | 19.72                              | 29.04                              |
| 2.    |    | HPLC<br>Chiralcel OD-H | 4% EtOH/hexane<br>1.0 mL/min       | 16.88                              | 18.66                              |
| 3.    |    | HPLC<br>Chiraldex AS   | 2% EtOH/hexane                     | 15.10                              | 17.35                              |
| 4.    |   | HPLC<br>Chiralcel OD-H | 5% EtOH/hexane<br>1.0 mL/min       | 21.36                              | 23.60                              |
| 5.    |  | HPLC<br>Chiralcel OD-H | 1% EtOH/hexane<br>1.0 mL/min       | 18.88                              | 21.05                              |
| 6.    |  | HPLC<br>Chiralcel AS   | 2% 2-propanol/hexane<br>1.0 mL/min | 18.60                              | 21.13                              |
| 7.    |  | HPLC<br>Chiralcel OB-H | 1% EtOH/hexane<br>1.0 mL/min       | 25.31                              | 30.28                              |

Table SM 1 (continued).

| entry | Substrate                                                                         | ee Assay               | Conditions                         | Retention Time of ( <i>R</i> ) isomer (min) | Retention Time of ( <i>S</i> ) isomer (min) |
|-------|-----------------------------------------------------------------------------------|------------------------|------------------------------------|---------------------------------------------|---------------------------------------------|
| 8.    | 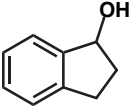 | HPLC<br>Chiralcel AS   | 2% 2-propanol/hexane<br>1.0 mL/min | 15.84                                       | 20.10                                       |
| 9.    |  | HPLC<br>Chiralcel AS   | 2% EtOH/hexane<br>1.0 mL/min       | 12.21                                       | 16.48                                       |
| 10.   |  | HPLC<br>Chiralcel OD-H | 2% EtOH/hexane<br>1.0 mL/min       | 17.58                                       | 20.88                                       |

Table SM 2. Methods utilized for the determination of % conversion.

| entry | alcohol                                                                             | ketone                                                                              | GC Conditions <sup>a</sup>                                                   | Retention Time of alcohol (min) | Retention Time of ketone (min) |
|-------|-------------------------------------------------------------------------------------|-------------------------------------------------------------------------------------|------------------------------------------------------------------------------|---------------------------------|--------------------------------|
| 1.    | 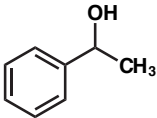   |    | 70 °C, 15 min;<br>7.0 °C/min to 220 °C<br><br>1.0 mL/min<br>carrier gas flow | 28.60                           | 25.53                          |
| 2.    |    |    | 70 °C, 15 min;<br>7.0 °C/min to 220 °C<br><br>1.0 mL/min<br>carrier gas flow | 34.44                           | 33.50                          |
| 3.    |    |    | 70 °C, 15 min;<br>7.0 °C/min to 220 °C<br><br>1.0 mL/min<br>carrier gas flow | 29.42                           | 25.46                          |
| 4.    |   |   | 70 °C, 0 min;<br>3.0 °C/min to 270 °C<br><br>1.0 mL/min<br>carrier gas flow  | 38.52                           | 37.60                          |
| 5.    |  |  | 70 °C, 0 min;<br>3.0 °C/min to 270 °C<br><br>1.0 mL/min<br>carrier gas flow  | 36.32                           | 35.04                          |
| 6.    |  |  | 70 °C, 15 min;<br>7.0 °C/min to 220 °C<br><br>1.0 mL/min<br>carrier gas flow | 42.00                           | 38.85                          |
| 7.    |  |  | 70 °C, 15 min;<br>7.0 °C/min to 220 °C<br><br>1.0 mL/min<br>carrier gas flow | 29.66                           | 26.97                          |

<sup>a</sup>All assays performed on Agilent DB-WAX column.

Table SM 2 (continued).

| entry | alcohol                                                                           | ketone                                                                            | GC Conditions <sup>a</sup>                                                   | Retention Time of alcohol | Retention Time of ketone |
|-------|-----------------------------------------------------------------------------------|-----------------------------------------------------------------------------------|------------------------------------------------------------------------------|---------------------------|--------------------------|
| 8.    | 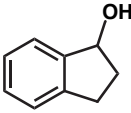 |  | 70 °C, 15 min;<br>7.0 °C/min to 220 °C<br><br>1.0 mL/min<br>carrier gas flow | 32.70                     | 31.76                    |
| 9.    |  |  | 70 °C, 15 min;<br>7.0 °C/min to 220 °C<br><br>1.0 mL/min<br>carrier gas flow | 32.95                     | 34.47                    |
| 10.   |  |  | 70 °C, 15 min;<br>7.0 °C/min to 220 °C<br><br>1.0 mL/min<br>carrier gas flow | 34.22                     | 32.54                    |

<sup>a</sup>All assays performed on Agilent DB-WAX column.
